# Supplementary material for: Assessing the influence of curcumin in sex specific oxidative stress, survival, and behavior in Drosophila melanogaster
Source: Oxford University Press journal article supplement (doi:10.1242/jeb.223867), 2020-01-01
Supplement: jeb223867supp.pdf [file jeb223867supp.pdf]

## Supplementary Information

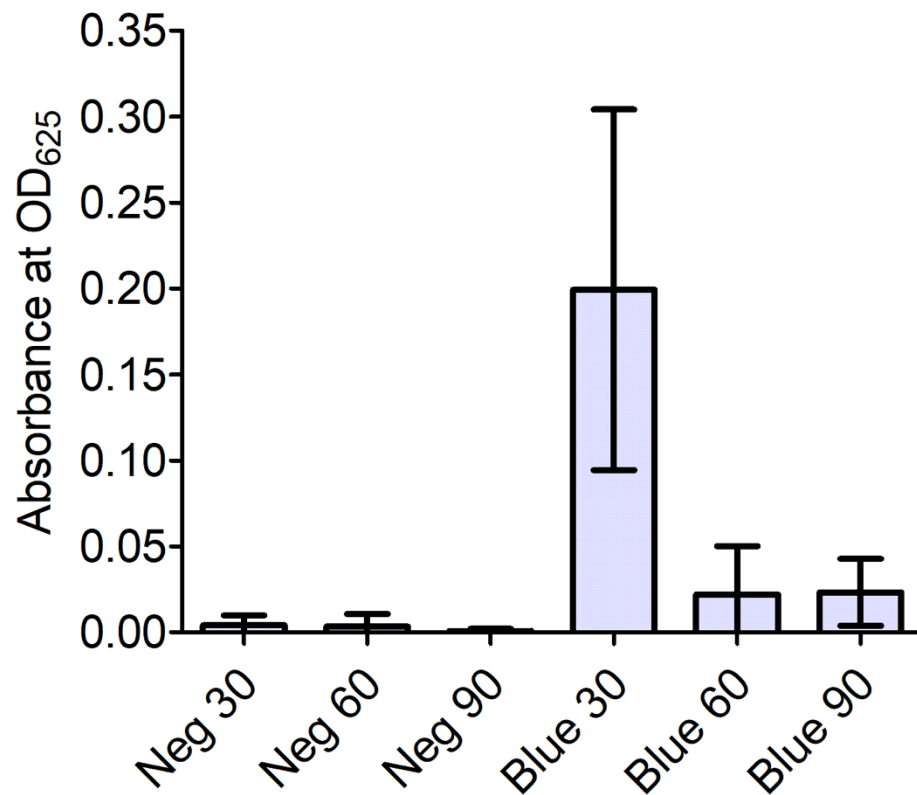

**Figure S1.** Clearance of blue food dye from larvae. Oregon R larvae were reared on media containing blue dye. Third instar larvae were removed from media and soaked in PBS for the indicated time (min), homogenized, and the OD<sub>625</sub> was determined to measure clearance of media from gut. The average from five replicates of 10 larvae per tube is presented and the error bars represent the standard deviation.

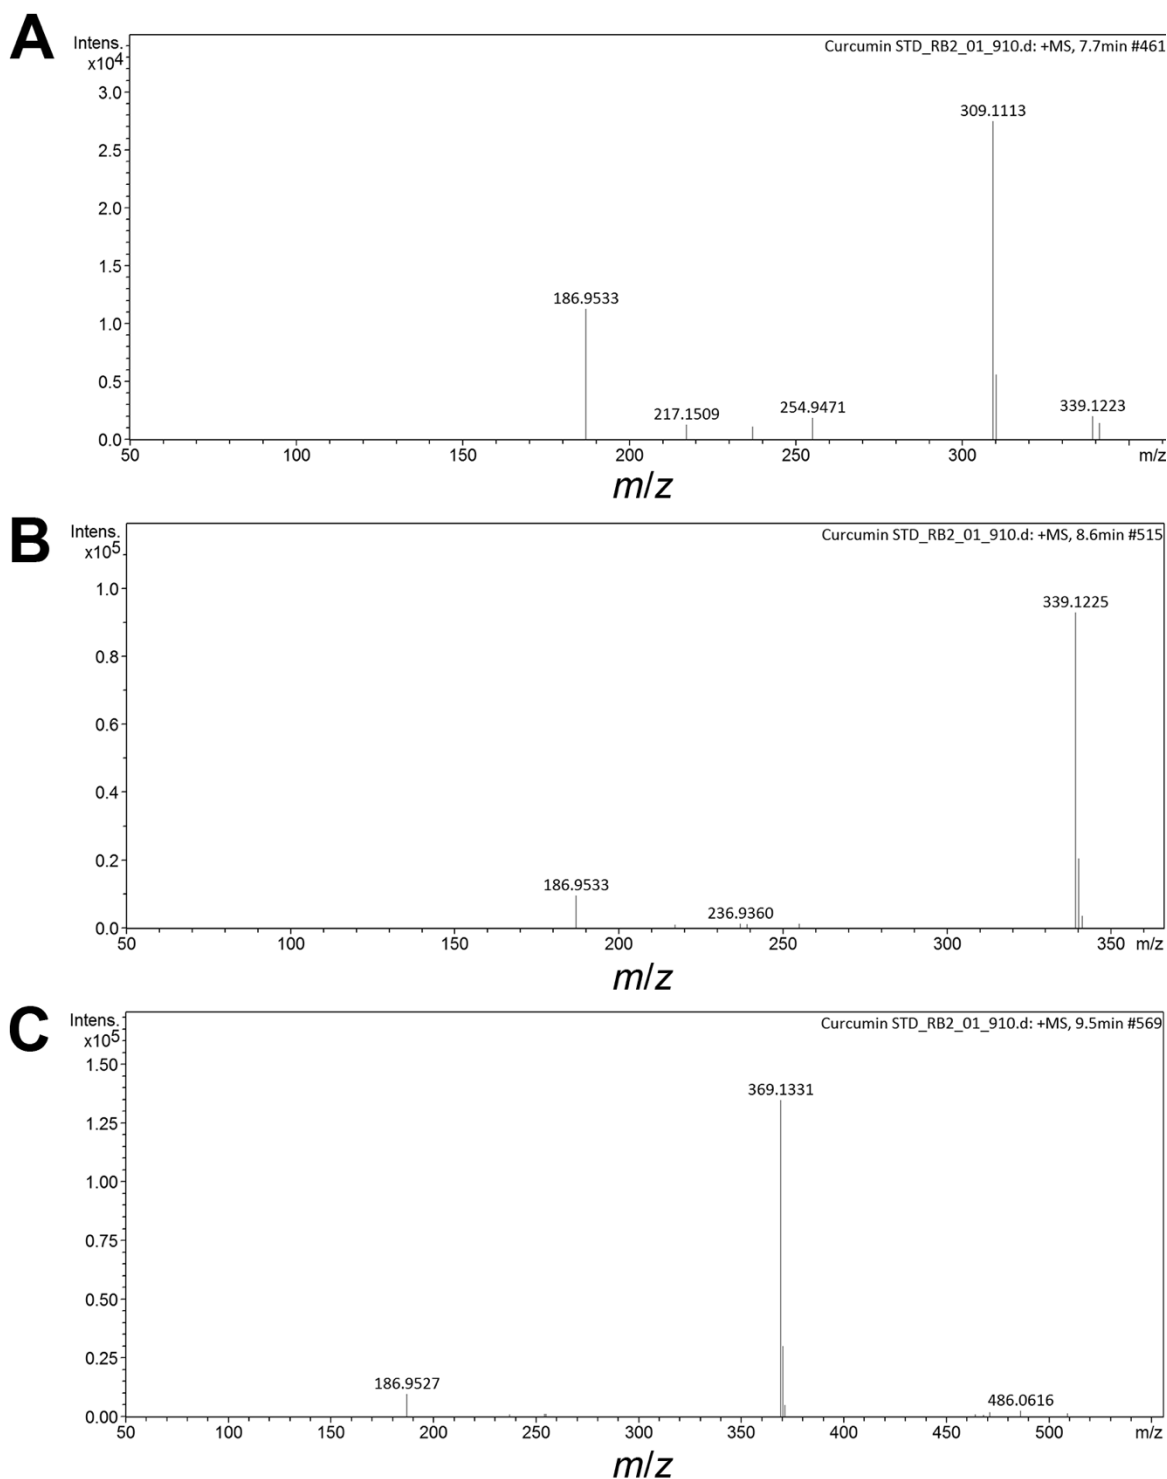

**Figure S2.** Accurate masses of the three curcuminoids tested, bisdemethoxycurcumin (A), demethoxycurcumin (B), and curcumin (C), as measured by HIRES-LCMS.

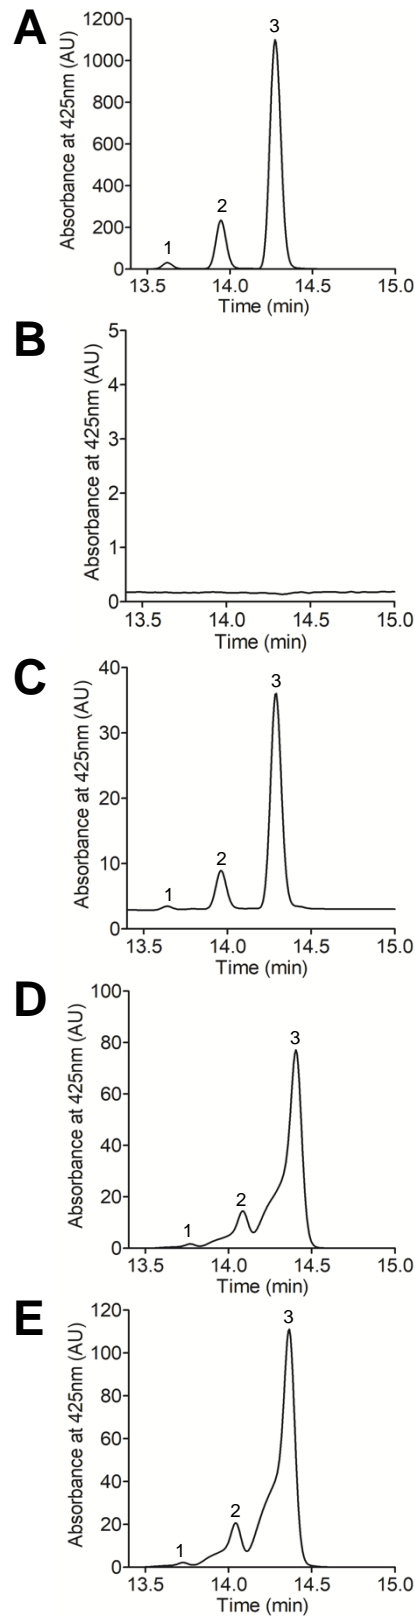

**Figure S3.** Curcuminoids in the tissues of larvae reared on media supplemented with curcuminoids are observed by HPLC at an absorbance of 425 nm. The curcuminoid

standard contains three compounds (A) and displays three peaks when run on HPLC, which correspond to bisdemethoxycurcumin (1), demethoxycurcumin (2), and curcumin (3). Extracts from larvae grown on medium lacking curcuminoids (B) and after curcuminoids were spiked into this extract (C). Extracts from larvae grown on medium supplemented with 25 mM curcuminoids (D) and after additional curcuminoids were spiked into this extract (E). Representative chromatograms are presented.
